# Supplementary material for: 1-Aminocyclopropane-1-carboxylate deaminase producers associated to maize and other Poaceae species
Source: PubMed Central journal article supplement (PMC6011333; doi:10.1186/s40168-018-0503-7), 2018-06-20
Supplement: 40168_2018_503_MOESM5_ESM.pdf [file 40168_2018_503_MOESM5_ESM.pdf]

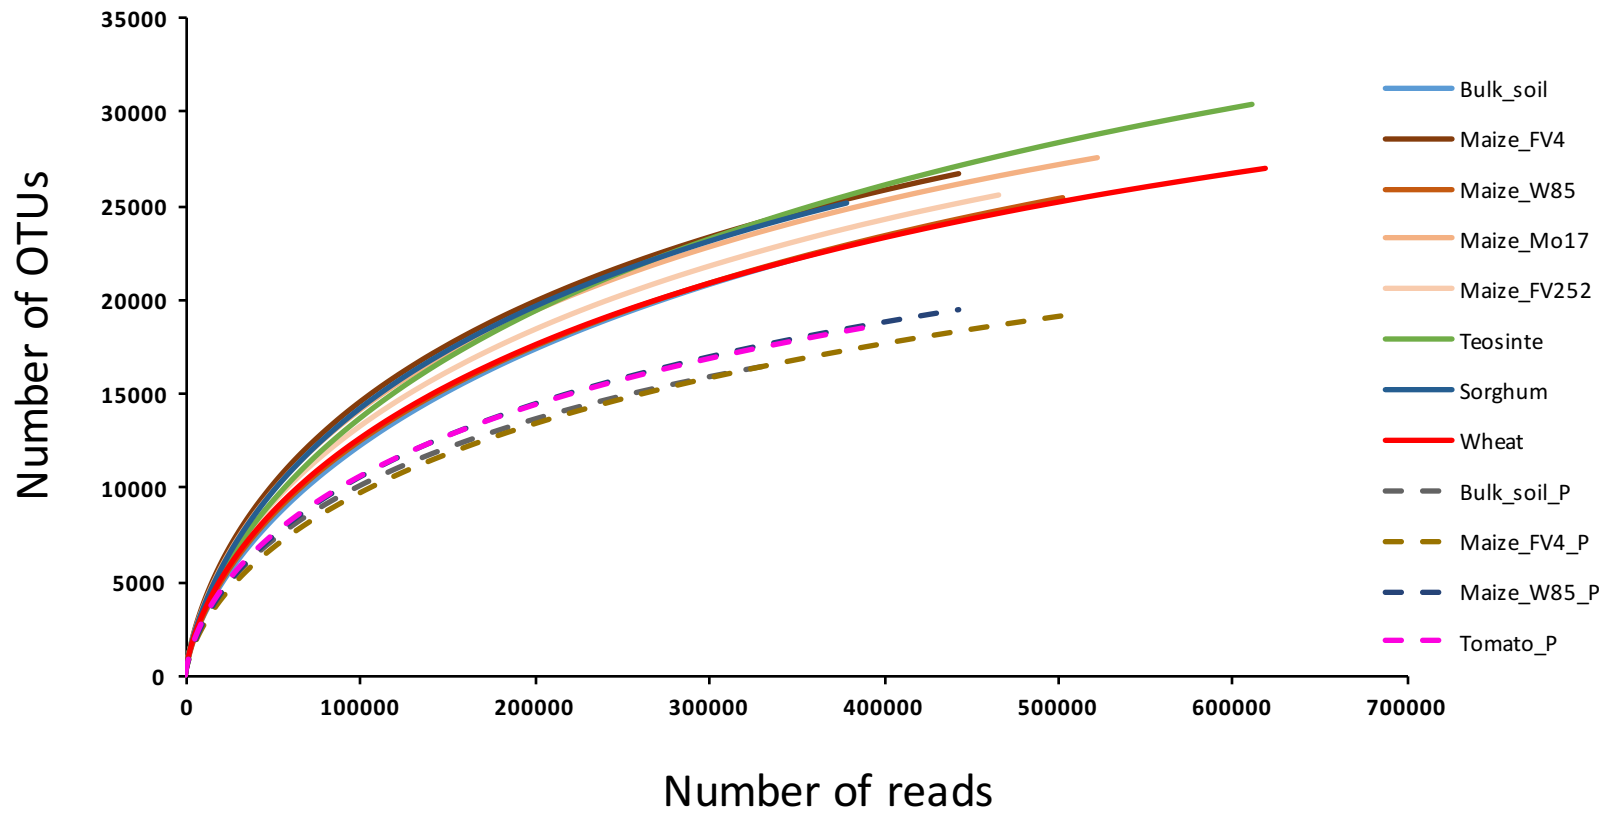

Figure S2
